# Supplementary material
Source: PubMed Central journal article supplement (PMC3044985)
Supplement: supp_M110.139915_jbc.M110.139915-2.pdf [file supp_M110.139915_jbc.M110.139915-2.pdf]

## Supplementary Data

Suppl. Fig. 1. Quantification of verteporfin inhibition of rapamycin- and serum starvation-induced autophagosome accumulation. (A) Punctate EGFP-LC3 was quantified using the automated microscopy assay. (mean  $\pm$  S.D., n=6). (B) Manual quantification of confocal microscopy images. (mean  $\pm$  S.D., n=3).

Suppl. Fig. 2. Effect of verteporfin regioisomers on chloroquine-induced autophagosome accumulation. MCF-7 cells stably expressing EGFP-LC3 were exposed for 4 h to 75  $\mu$ M CQ without or with two concentrations of each verteporfin regioisomer or the commercial verteporfin. Punctate EGFP-LC3 was quantitated using the automated microscopy assay. (mean  $\pm$  S.D., n=3).
