# Supplementary material
Source: PubMed Central journal article supplement (PMC3044985)

Supplementary Figure 1

A

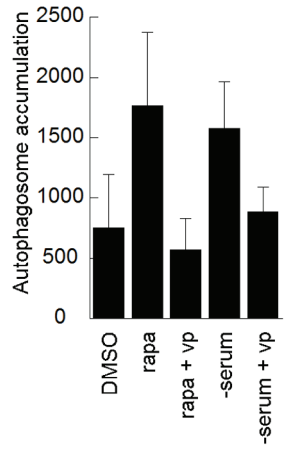

B

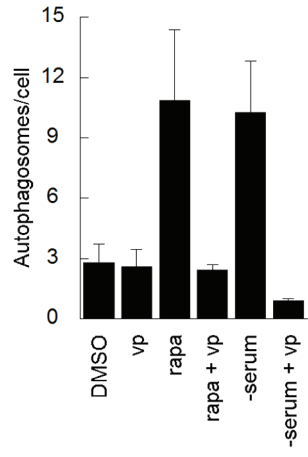

Supplementary Figure 2

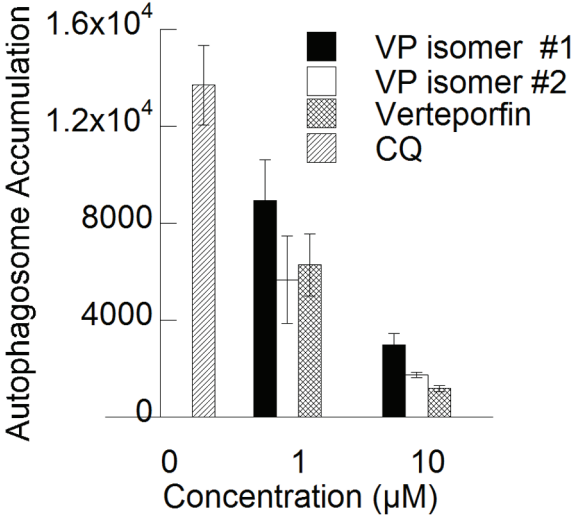

Supplement: supp_M110.139915_jbc.M110.139915-1.pdf [file supp_M110.139915_jbc.M110.139915-1.pdf]
